# Supplementary material for: Transient Changes in Serum CEA, CA19-9, CRP, YKL-40, and IL-6 during Adjuvant Chemotherapy and Survival of Patients with Colorectal Cancer
Source: MDPI journal article supplement (doi:10.3390/ijms24076753), 2023-04-04
Supplement: s1 [file s1]

## SUPPLEMENTARY CONTENTS

|                                                                                                                                                                                                                 |    |
|-----------------------------------------------------------------------------------------------------------------------------------------------------------------------------------------------------------------|----|
| Figure S1A. Flow diagram showing the selection of patients, categorization of pattern of biomarker change, and inclusion in analyses for CEA in LIPSYT / TAUH / TUH cohorts.....                                | 2  |
| Figure S1B. Flow diagram showing the selection of patients, categorization of pattern of biomarker change, and inclusion in analyses for CA19-9, CRP, YKL-40, IL-6 in the LIPSYT cohort.....                    | 3  |
| Figure S2. CEA dynamics within reference range during adjuvant therapy per patient in the LIPSYT data .....                                                                                                     | 4  |
| Figure S3. Disease-free survival (DFS) (LIPSYT study panel A. TAUH panel C) and overall survival (OS) (LIPSYT study panel B and TAUH cohort panel D) according to CA19-9 kinetics during adjuvant therapy ..... | 5  |
| Figure S4. Disease-free survival (DFS) (LIPSYT study panel A. TAUH panel C) and overall survival (OS) (LIPSYT study panel B and TAUH cohort panel D) according to CRP kinetics during adjuvant therapy .....    | 6  |
| Figure S5. Disease-free survival (DFS) (panel A) and overall survival (OS) (panel B) according to YKL-40 kinetics during adjuvant therapy .....                                                                 | 7  |
| Figure S6. Disease-free survival (DFS) (panel A) and overall survival (OS) (panel B) according to IL-6 kinetics during adjuvant therapy .....                                                                   | 8  |
| Table S1. Patient demographics according to CEA dynamics group. Statistically significant results are presented in red .....                                                                                    | 9  |
| Table S2. Associations of “Transient increase”, “No increase” and “Persistent increase” of CEA with haematological and biochemical parameters, and treatment-related adverse events.....                        | 10 |

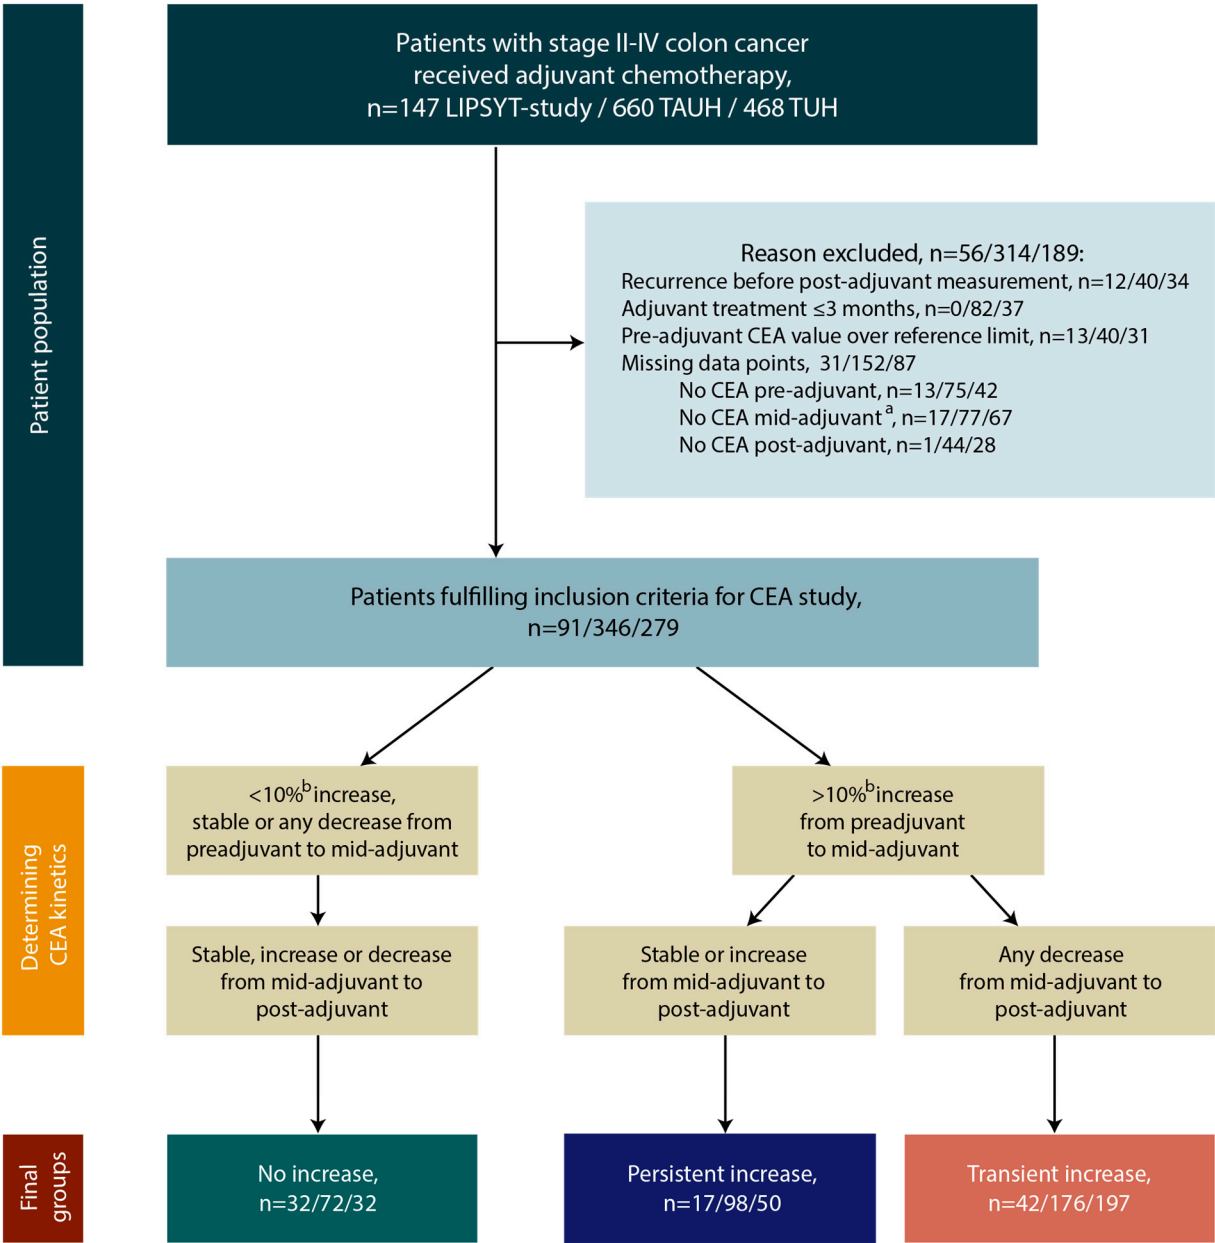

<sup>a</sup> CEA was not routinely measured in the early inclusion period in any of the cohorts.

<sup>b</sup> The 10% cut-off was chosen, because a >10% change was greater than the intra-assay and inter-assay coefficient of variation (CV) of the biomarkers evaluated, and the 10% cut-off does not depend on the biomarker reference range

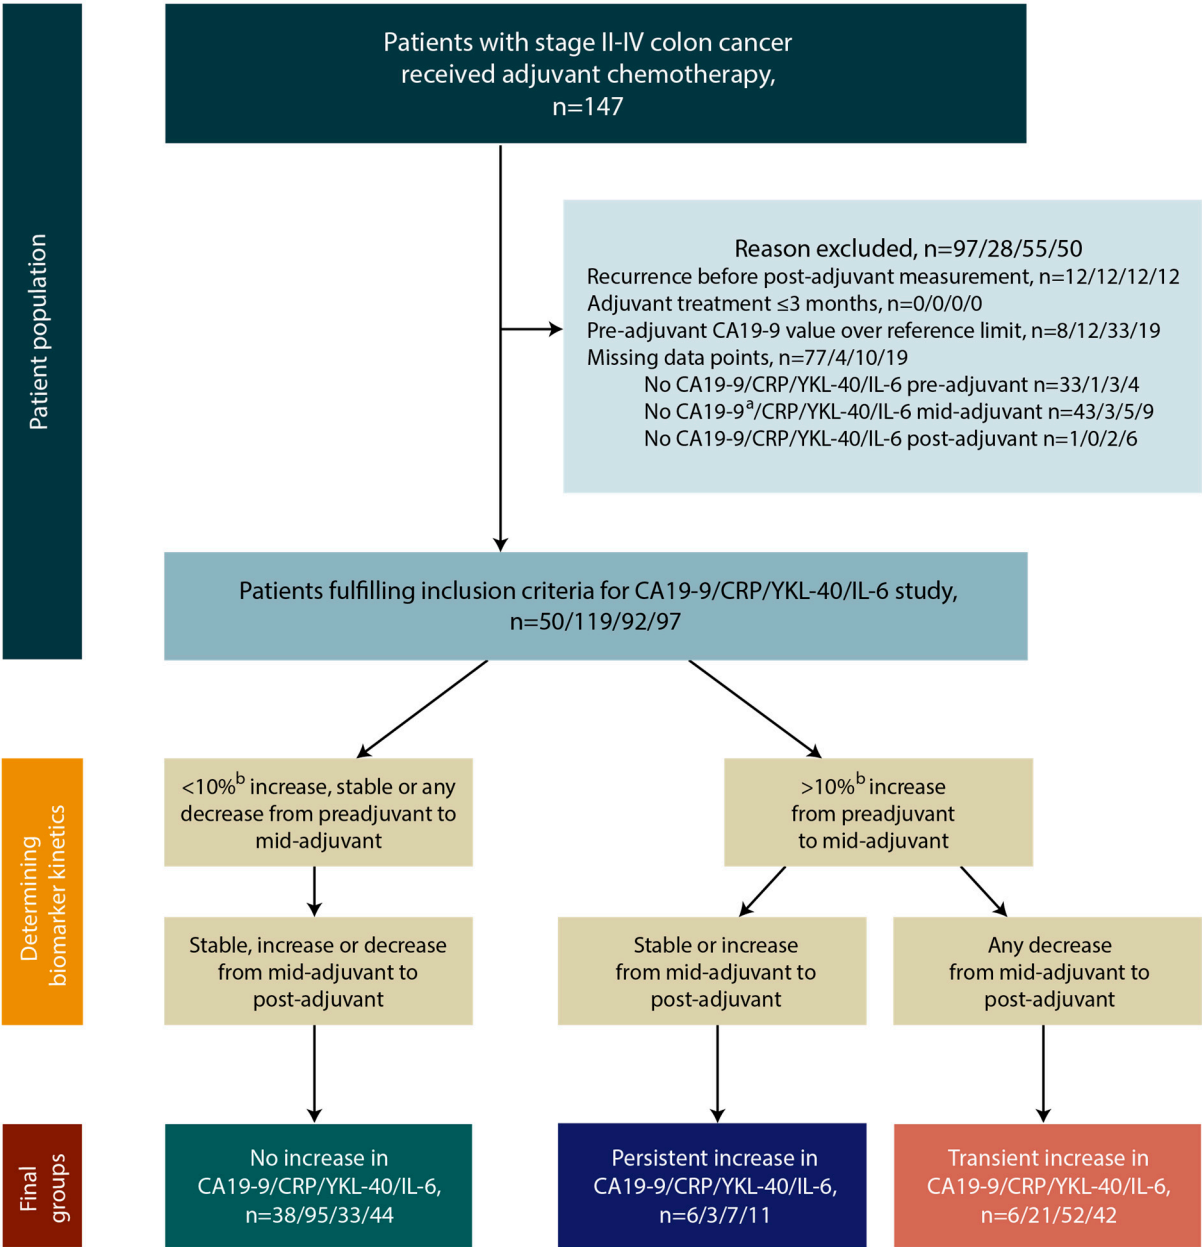

<sup>a</sup> CA19-9 was not routinely measured in the early inclusion period in the LIPSYT-study

<sup>b</sup> The 10% cut-off was chosen, because a >10% change was greater than the intra-assay and inter-assay coefficient of variation (CV) of the biomarkers evaluated, and the 10% cut-off does not depend on the biomarker reference range

**Figure S1. A. Flow diagram showing the selection of patients, categorization of pattern of biomarker change, and inclusion in analyses for CEA in LIPSYT / TAUH / TUH cohorts. B. Flow diagram showing the selection of patients, categorization of pattern of biomarker change, and inclusion in analyses for CA19-9, CRP, YKL-40, IL-6 in the LIPSYT cohort.**

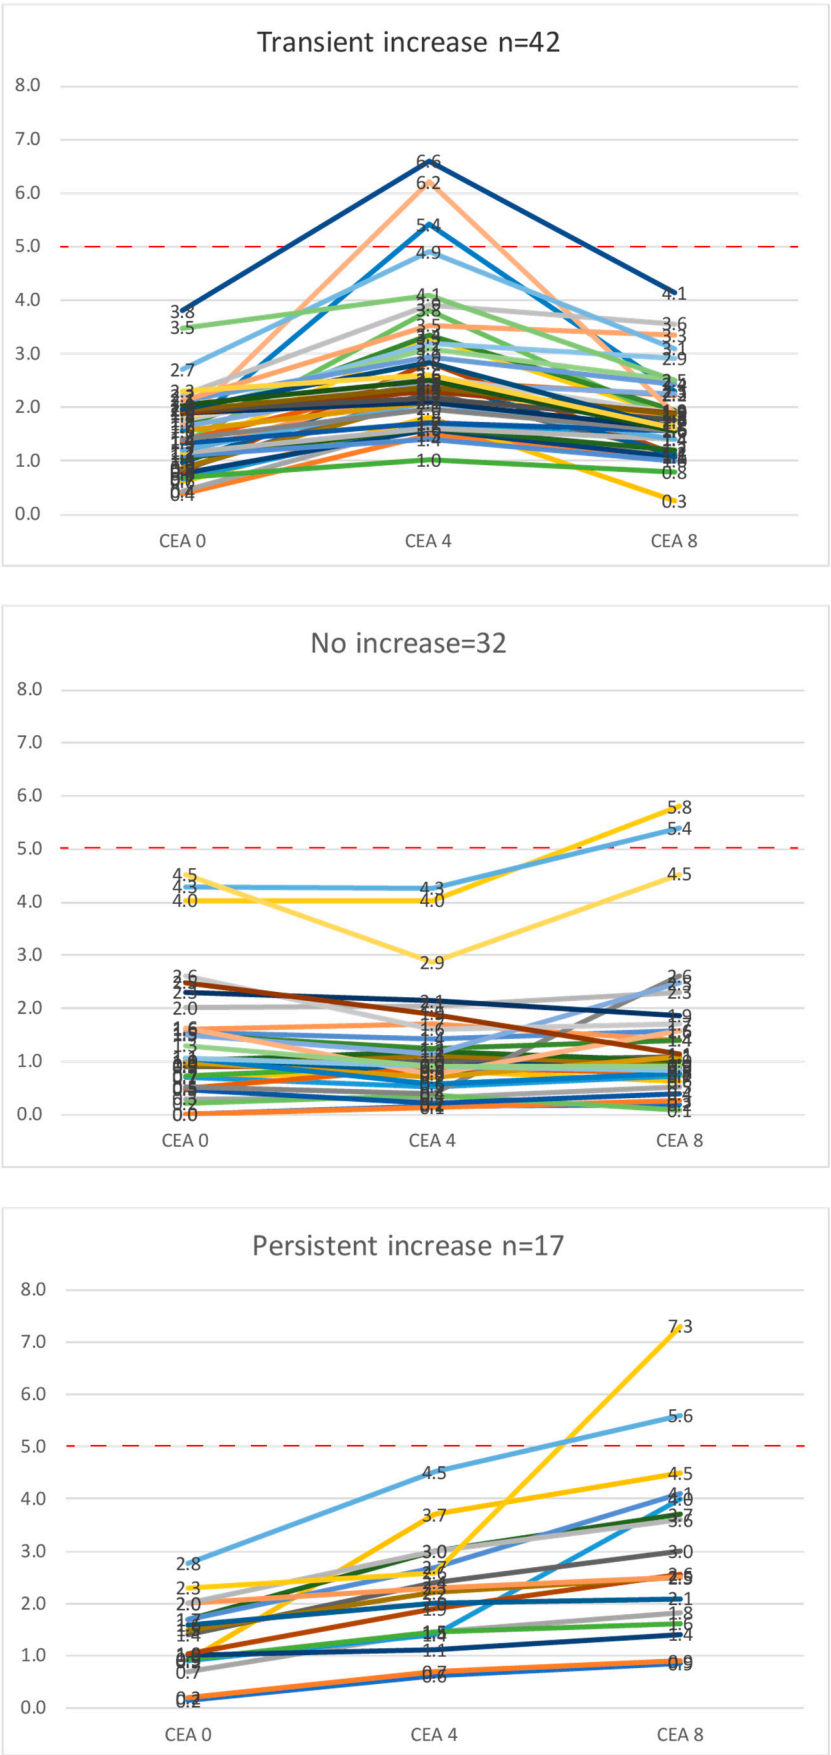

Figure S2. CEA dynamics within reference range during adjuvant therapy per patient in the LIPSYT data.

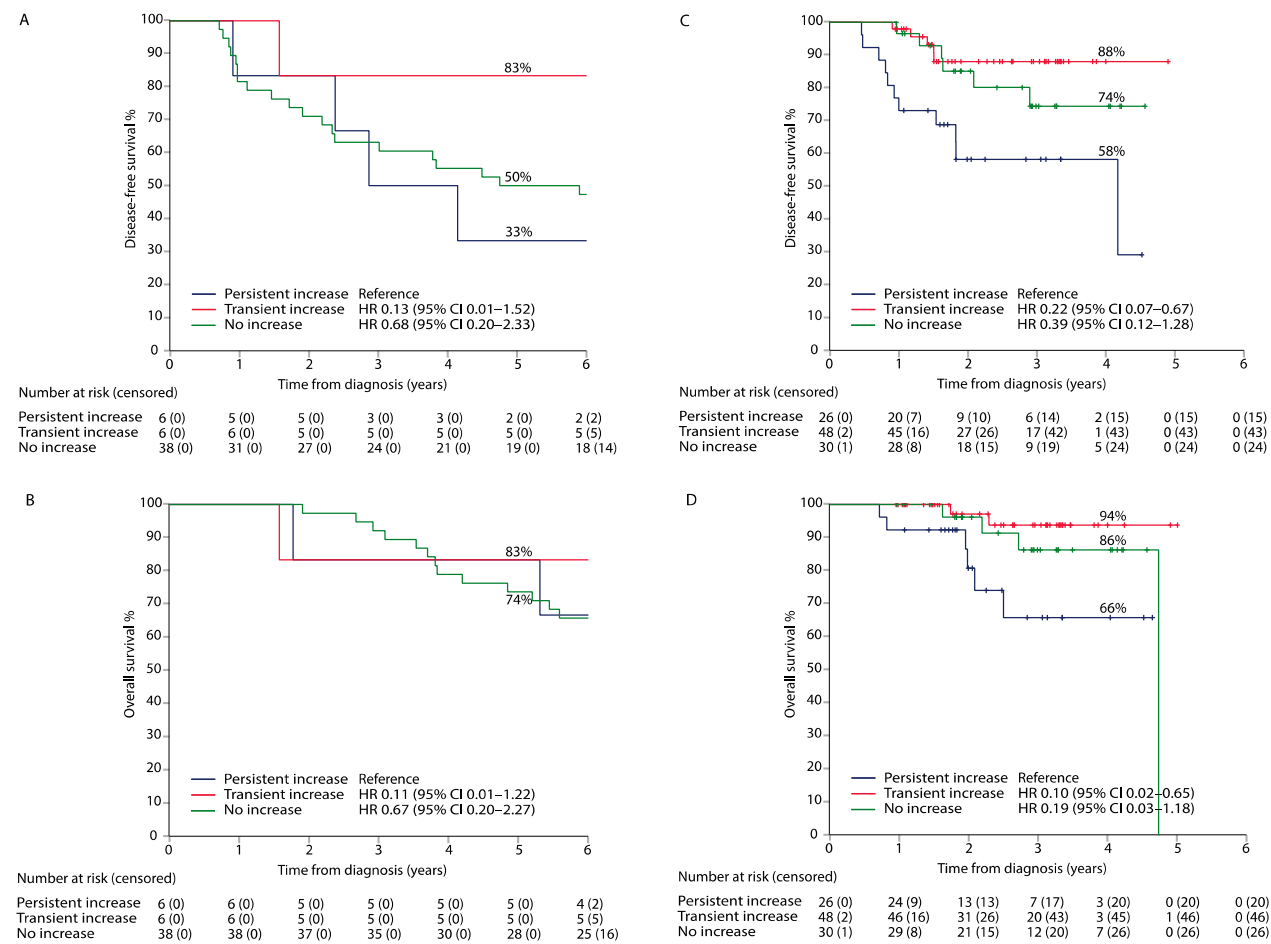

**Figure S3. Disease-free survival (DFS) (LIPSYT study panel A. TAUH panel C) and overall survival (OS) (LIPSYT study panel B and TAUH cohort panel D) according to CA19-9 kinetics during adjuvant therapy.**

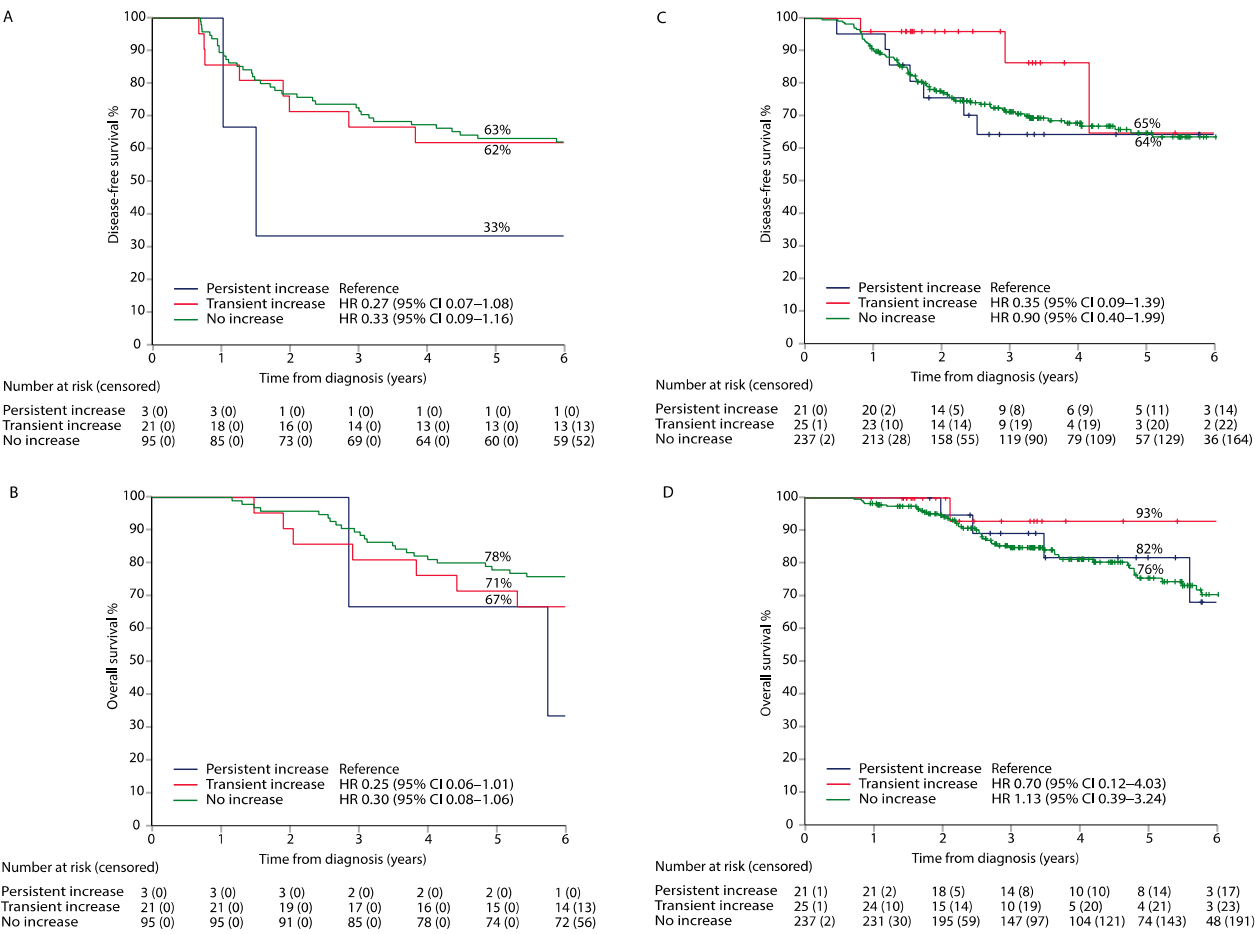

**Figure S4. Disease-free survival (DFS) (LIPSYT study panel A. TAUH panel C) and overall survival (OS) (LIPSYT study panel B and TAUH cohort panel D) according to CRP kinetics during adjuvant therapy.**

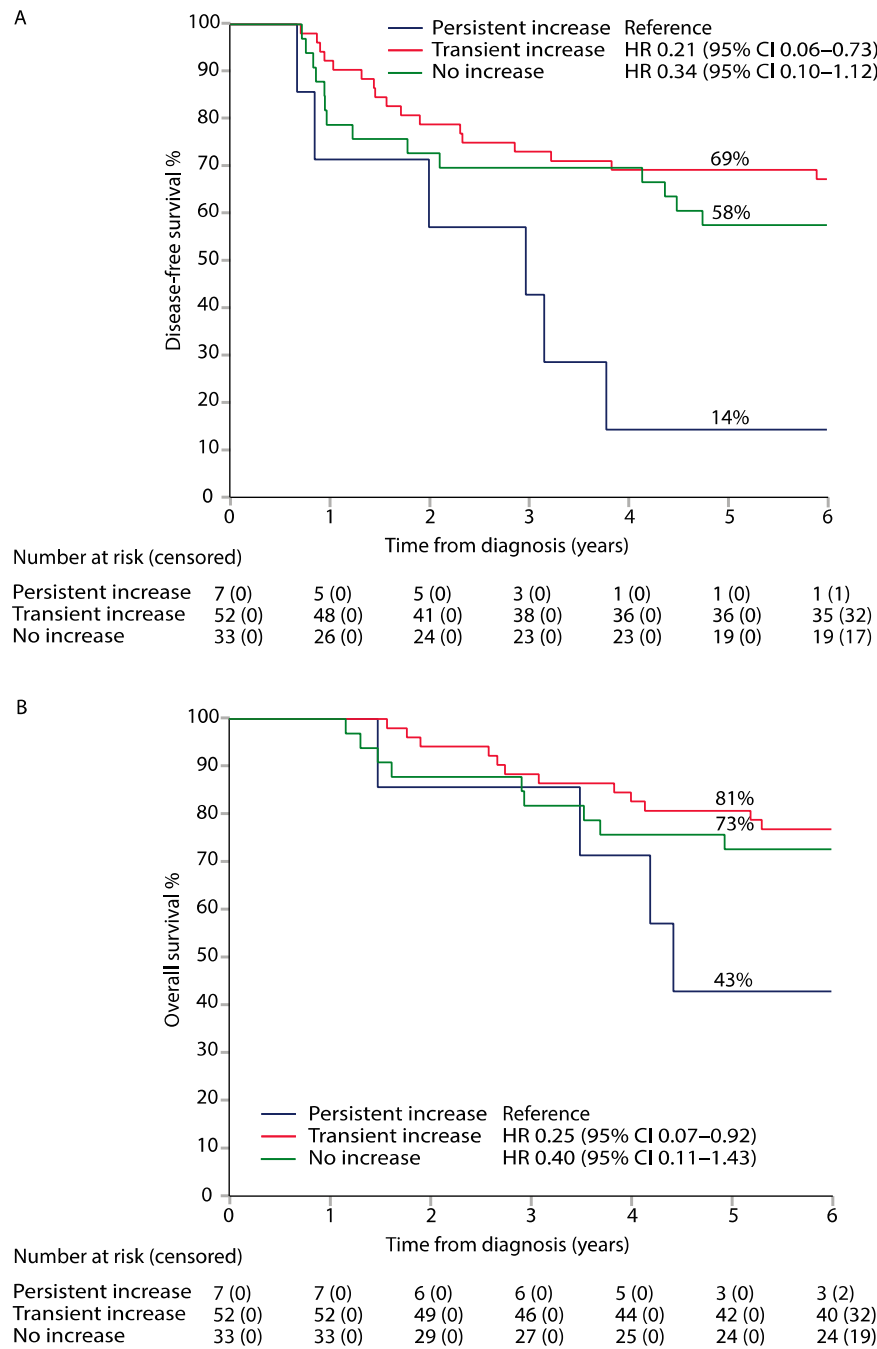

**Figure S5. Disease-free survival (DFS) (panel A) and overall survival (OS) (panel B) according to YKL-40 kinetics during adjuvant therapy.**

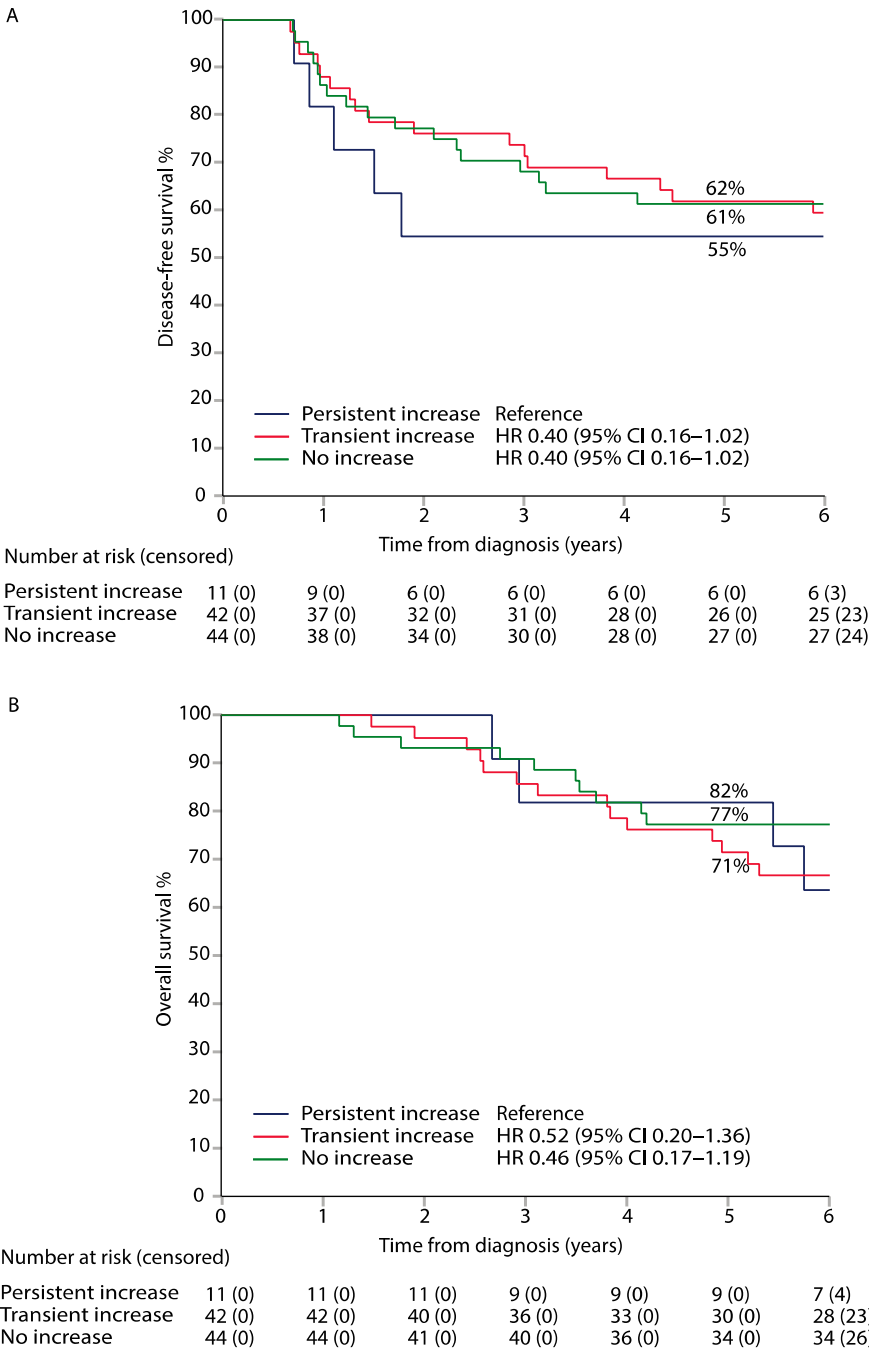

**Figure S6. Disease-free survival (DFS) (panel A) and overall survival (OS) (panel B) according to IL-6 kinetics during adjuvant therapy.**



**Table S1. Patient demographics according to CEA dynamics group. Statistically significant results are presented in red.**

|                                 |                          | LIPSYT study       |      |             |      |                     |       | TAUH cohort        |      |             |      |                     |      | TUH cohort         |      |             |      |                     |      |
|---------------------------------|--------------------------|--------------------|------|-------------|------|---------------------|-------|--------------------|------|-------------|------|---------------------|------|--------------------|------|-------------|------|---------------------|------|
|                                 |                          | Transient increase |      | No increase |      | Persistent increase |       | Transient increase |      | No increase |      | Persistent increase |      | Transient increase |      | No increase |      | Persistent increase |      |
|                                 |                          | n=42               | 46 % | n=32        | 35 % | n=17                | 19 %  | n=176              | 51 % | n=72        | 21 % | n=98                | 28 % | n=197              | 71 % | n=32        | 11 % | n=50                | 18 % |
| Age                             | Median yrs (range)       | 61 (37–74)         |      | 58 (50–73)  |      | 61 (31–70)          |       | 67 (24–85)         |      | 68 (37–87)  |      | 68 (39–85)          |      | 67 (33–84)         |      | 68 (50–83)  |      | 65 (28–81)          |      |
|                                 | <70                      | 35                 | 83 % | 30          | 94 % | 17                  | 100 % | 117                | 67 % | 42          | 58 % | 58                  | 59 % | 123                | 62 % | 21          | 66 % | 34                  | 68 % |
|                                 | ≥70                      | 7                  | 17 % | 2           | 6 %  | 0                   | 0 %   | 59                 | 34 % | 30          | 42 % | 40                  | 41 % | 74                 | 38 % | 11          | 34 % | 16                  | 32 % |
| Sex                             | Male                     | 21                 | 50 % | 17          | 53 % | 9                   | 53 %  | 90                 | 51 % | 44          | 61 % | 57                  | 58 % | 105                | 53 % | 11          | 34 % | 33                  | 66 % |
|                                 | Female                   | 21                 | 50 % | 15          | 47 % | 8                   | 47 %  | 86                 | 49 % | 28          | 39 % | 41                  | 42 % | 93                 | 47 % | 21          | 66 % | 17                  | 34 % |
| Inflammatory disease*           | No                       | 40                 | 95 % | 28          | 88 % | 15                  | 88 %  | 167                | 95 % | 66          | 92 % | 96                  | 98 % | 189                | 96 % | 29          | 91 % | 48                  | 96 % |
|                                 | Yes                      | 2                  | 5 %  | 4           | 13 % | 2                   | 12 %  | 9                  | 5 %  | 6           | 8 %  | 2                   | 2 %  | 8                  | 4 %  | 3           | 9 %  | 2                   | 4 %  |
| Chemotherapy regimen            | 5FU+LV bolusinj          | 23                 | 55 % | 20          | 63 % | 4                   | 24 %  |                    |      |             |      |                     |      | -                  | -    | -           | -    | -                   | -    |
|                                 | 5FU+LV continuous inf    | 19                 | 45 % | 12          | 38 % | 13                  | 77 %  |                    |      |             |      |                     |      | -                  | -    | -           | -    | -                   | -    |
|                                 | capecitabine             | -                  | -    | -           | -    | -                   | -     | 58                 | 33 % | 44          | 62 % | 53                  | 54 % | 76                 | 39 % | 16          | 50 % | 28                  | 56 % |
|                                 | capecitabine+oxaliplatin | -                  | -    | -           | -    | -                   | -     | 118                | 67 % | 27          | 38 % | 45                  | 46 % | 121                | 61 % | 16          | 50 % | 22                  | 44 % |
| Primary location                | Right colon              | 11                 | 26 % | 5           | 16 % | 8                   | 47 %  | 64                 | 36 % | 18          | 25 % | 26                  | 27 % | 97                 | 49 % | 14          | 44 % | 8                   | 16 % |
|                                 | Left colon               | 18                 | 43 % | 8           | 25 % | 3                   | 18 %  | 49                 | 27 % | 17          | 23 % | 31                  | 32 % | 47                 | 24 % | 11          | 34 % | 12                  | 24 % |
|                                 | Rectal                   | 13                 | 31 % | 19          | 59 % | 6                   | 35 %  | 66                 | 37 % | 38          | 52 % | 41                  | 42 % | 53                 | 27 % | 7           | 22 % | 30                  | 60 % |
| Radiotherapy for rectal primary | No                       | 3                  | 23 % | 2           | 11 % | 0                   | 0 %   | 135                | 77 % | 42          | 58 % | 66                  | 67 % | 141                | 72 % | 26          | 81 % | 28                  | 56 % |
|                                 | pre op                   | 2                  | 15 % | 2           | 11 % | 2                   | 33 %  | 14                 | 8 %  | 12          | 17 % | 14                  | 14 % | 33                 | 17 % | 5           | 16 % | 12                  | 24 % |
|                                 | post op/chemoradiation   | 8                  | 62 % | 15          | 79 % | 4                   | 67 %  | 27                 | 15 % | 18          | 25 % | 18                  | 18 % | 23                 | 12 % | 1           | 3 %  | 10                  | 20 % |
| (y)pTNM stage                   | IIA-B                    | 16                 | 38 % | 14          | 44 % | 3                   | 18 %  | 35                 | 20 % | 23          | 32 % | 26                  | 27 % | 63                 | 32 % | 9           | 28 % | 18                  | 36 % |
|                                 | IIIA-C                   | 24                 | 57 % | 16          | 50 % | 13                  | 77 %  | 140                | 80 % | 48          | 67 % | 71                  | 72 % | 134                | 68 % | 21          | 66 % | 31                  | 62 % |
|                                 | IV                       | 2                  | 5 %  | 2           | 6 %  | 1                   | 6 %   | 1                  | 1 %  | 1           | 1 %  | 1                   | 1 %  | 0                  | 0 %  | 2           | 6 %  | 1                   | 2 %  |
| Grades                          | I-II                     | -                  | -    | -           | -    | -                   | -     | 130                | 74 % | 50          | 69 % | 71                  | 72 % | 152                | 77 % | 25          | 78 % | 35                  | 70 % |
|                                 | III                      | -                  | -    | -           | -    | -                   | -     | 46                 | 26 % | 22          | 31 % | 27                  | 28 % | 45                 | 23 % | 7           | 22 % | 15                  | 30 % |
| Smoking                         | never                    | -                  | -    | -           | -    | -                   | -     | -                  | -    | -           | -    | -                   | -    | 109                | 55 % | 22          | 69 % | 24                  | 48 % |
|                                 | former/current           | -                  | -    | -           | -    | -                   | -     | -                  | -    | -           | -    | -                   | -    | 78                 | 39 % | 8           | 25 % | 21                  | 42 % |
|                                 | Unknown                  | -                  | -    | -           | -    | -                   | -     | -                  | -    | -           | -    | -                   | -    | 10                 | 5 %  | 2           | 6 %  | 5                   | 10 % |
|                                 | 0                        | -                  | -    | -           | -    | -                   | -     | 111                | 63 % | 41          | 57 % | 53                  | 54 % | 163                | 83 % | 24          | 75 % | 37                  | 74 % |
| Charlson comorbidity index      | 1                        | -                  | -    | -           | -    | -                   | -     | 53                 | 30 % | 21          | 29 % | 33                  | 34 % | 21                 | 11 % | 6           | 19 % | 11                  | 22 % |
|                                 | 2 or more                | -                  | -    | -           | -    | -                   | -     | 12                 | 7 %  | 10          | 14 % | 12                  | 12 % | 13                 | 7 %  | 2           | 6 %  | 2                   | 4 %  |

**Table S2. Associations of “Transient increase”, “No increase” and “Persistent increase” of CEA with haematological and biochemical parameters, and treatment-related adverse events.**

|                                           | <b>Transient increase</b><br>n = 42 | <b>No increase</b><br>n = 32 | <b>Persistent increase</b><br>n = 17 |                            |
|-------------------------------------------|-------------------------------------|------------------------------|--------------------------------------|----------------------------|
| <b>Laboratory test - median (range)</b>   |                                     |                              |                                      | <b>p-value<sup>a</sup></b> |
| Alanine amino transferase                 | 0 (-336 - +22)                      | 1 (-47 - +86)                | 2 (-26 - +11)                        | 0.923                      |
| Alkaline phosphatase                      | 6 (-260 - +105)                     | -4 (-43 - +39)               | 4 (-230 - +480)                      | 0.642                      |
| Creatinine                                | 4 (-10 - +25)                       | 1 (-33 - +18)                | 7 (-3 - +26)                         | 0.029/0.514 <sup>b</sup>   |
| Sodium                                    | 0 (-6 - +9)                         | -0.5 (-6 - +4)               | 0 (-3 - +6)                          | 0.374                      |
| Potassium                                 | 0 (-1.5 - +0.6)                     | 0 (-0.6 - +0.5)              | 0 (-0.3 - +0.5)                      | 0.524                      |
| INR                                       | 0 (-0.2 - +0.91)                    | 0 (-0.1 - +2)                | 0 (-0.1 - +0.7)                      | 0.679                      |
| Tromboplastin time                        | -9 (-62 - +101)                     | -15 (-62 - +31)              | -5 (-58 - +44)                       | 0.639                      |
| Prealbumin                                | 20 (-53 - +92)                      | 14 (-90 - +105)              | 10 (-39 - +85)                       | 0.745                      |
| Albumin                                   | -0.3 (-12 - +7.6)                   | -1.6 (-12.2 - +5.6)          | 0.5 (-6.5 - +6.6)                    | 0.157                      |
| Haemoglobin                               | 0 (-34 - +16)                       | -2.5 (-17 - +14)             | 1 (-15 - +43)                        | 0.283                      |
| Leukocytes                                | -0.6 (-5.1 - +2.5)                  | -1.2 (-13.8 - +1.8)          | -1.4 (-2.9 - +0.29)                  | 0.064                      |
| Trombocytes                               | 2.5 (-154 - +54)                    | 0 (-19 - +66)                | 1 (-66 - +12)                        | 0.133                      |
| <b>Adverse events - grade 0-1/2-4 (%)</b> |                                     |                              |                                      | <b>p value</b>             |
| Worst any toxicity                        | 76% / 24%                           | 75% / 25%                    | 77% / 24%                            | 0.991                      |
| Worst haematological toxicity             | 52% / 48%                           | 28% / 72%                    | 59% / 41%                            | 0.052                      |
| Diarrhoea                                 | 43% / 57%                           | 31% / 69%                    | 47% / 53%                            | 0.469                      |
| Stomatitis                                | 36% / 64%                           | 41% / 59%                    | 65% / 35%                            | 0.119                      |
| Mucositis                                 | 91% / 10%                           | 84% / 16%                    | 100% / 0%                            | 0.217                      |
| Flatulence                                | 95% / 5%                            | 91% / 9%                     | 100% / 0%                            | 0.375                      |
| Heartburn                                 | 91% / 10%                           | 81% / 19%                    | 94% / 6%                             | 0.331                      |

<sup>a</sup> Kruskal-Wallis for delta (mid-adjuvant minus before adjuvant) of laboratory value in CEA kinetics groups.

<sup>b</sup> Chi-Square for "transient increase", "no Increase", vs. "persistent increase" kinetics of CEA and creatinine.
